# Supplementary material for: Neuroinvasive West Nile Virus Infection in Immunosuppressed and Immunocompetent Adults
Source: PubMed Central journal article supplement (PMC10979308; doi:10.1001/jamanetworkopen.2024.4294), 2024-03-28

## Supplemental Online Content

Mbonde AA, Gritsch D, Harahsheh EY, et al. Neuroinvasive West Nile virus infection in immunosuppressed and immunocompetent adults. *JAMA Netw Open*. 2024;7(4):e244294. doi:10.1001/jamanetworkopen.2024.4294

**eTable.** Regression Analysis for Factors Associated With 90-Day Mortality Among Patients With Immunosuppression

**eFigure 1.** Flow Chart Showing Number of Participants Screened and Enrolled

**eFigure 2.** Total Number of Neuroinvasive West Nile Virus Cases Admitted Across all the 3 Mayo Clinic Hospitals in Arizona, Florida, and Rochester Between July 2006 to September 2019, Grouped by the Months and Season of Presentation Independent of the Year

This supplemental material has been provided by the authors to give readers additional information about their work.

**Supplementary Table 1. Regression analysis for factors associated with 90-day mortality amongst those with immunosuppression**

| Variable                      | Univariable analysis |         |
|-------------------------------|----------------------|---------|
|                               | HR (95% CI)          | P-value |
| Age, years, per unit increase | 1.02 (0.98, 1.05)    | 0.321   |
| Gender                        |                      |         |
| Male                          | REF                  |         |
| Female                        | 0.63 (0.24, 1.65)    | 0.344   |
| Clinical Seizure              |                      |         |
| Absent                        | REF                  |         |
| Present                       | 0.74 (0.22, 2.55)    | 0.638   |
| Fever at admission            |                      |         |
| Absent                        | REF                  |         |
| Present                       | 1.08 (0.41, 2.86)    | 0.872   |
| Headache                      |                      |         |
| Absent                        | REF                  |         |
| Present                       | 0.92 (0.37, 2.27)    | 0.852   |
| Insomnia                      |                      |         |
| Absent                        | REF                  |         |
| Present                       | 3.99 (1.30, 12.26)   | 0.016   |
| Myalgias                      |                      |         |
| Absent                        | REF                  |         |
| Present                       | 1.23 (0.41, 3.73)    | 0.712   |
| Altered mental status         |                      |         |
| Absent                        | REF                  |         |
| Present                       | 1.80 (0.60, 5.47)    | 0.297   |
| Focal motor symptoms          |                      |         |
| Absent                        | REF                  |         |
| Present                       | 1.60 (0.63, 4.08)    | 0.324   |
| Myoclonus                     |                      |         |
| Absent                        | REF                  |         |

|                                                |                    |       |
|------------------------------------------------|--------------------|-------|
| Present                                        | 1.52 (0.50, 4.59)  | 0.459 |
| Duration of symptoms,(days), per unit increase | 0.96 (0.89, 1.03)  | 0.270 |
| ICU admission                                  |                    |       |
| Absent                                         | REF                |       |
| Present                                        | 3.89 (1.07, 12.66) | 0.038 |
| Coma, GCS < 8                                  |                    |       |
| Absent                                         | REF                |       |
| Present                                        | 3.47 (1.38, 8.72)  | 0.008 |
| Mechanical ventilation                         |                    |       |
| Absent                                         | REF                |       |
| Present                                        | 4.97 (1.44, 17.08) | 0.011 |
| WNV Specific Treatment                         |                    |       |
| Not administered                               | REF                |       |
| Administered                                   | 1.02 (0.39, 2.69)  | 0.969 |
| IVIg treatment                                 |                    |       |
| Not administered                               | REF                |       |
| Administered                                   | 1.56 (0.59, 4.12)  | 0.367 |
| Interferon treatment                           |                    |       |
| Not administered                               | REF                |       |
| Administered                                   | 1.24 (0.50, 3.09)  | 0.641 |
| Positive Serum WNV IgM                         |                    |       |
| Absent                                         | REF                |       |
| Present                                        | 0.37 (0.14, 1.00)  | 0.050 |
| Positive CSF WNV IgM                           |                    |       |
| Absent                                         | REF                |       |
| Present                                        | 0.61 (0.24, 1.55)  | 0.295 |
| CSF WNV PCR, positive                          | 1.38 (0.41, 4.59)  | 0.601 |
| Tracheostomy procedure done                    |                    |       |
| Absent                                         | REF                |       |
| Present                                        | 1.99 (0.76, 5.16)  | 0.159 |

|                                                                   |                    |       |
|-------------------------------------------------------------------|--------------------|-------|
| CSF glucose, level mg/dl, per unit increase                       | 1.01 (0.98, 1.03)  | 0.563 |
| CSF protein, level mg/dl, per unit increase                       | 1.01 (1.00, 1.012) | 0.215 |
| CSF white blood cell count, cell/mm <sup>3</sup> , per unit incre | 1.00 (1.00, 1.01)  | 0.376 |
| Acute MRI abnormalities present                                   |                    |       |
| Absent                                                            | REF                |       |
| Present                                                           | 0.48 (0.14, 1.59)  | 0.227 |
| WNV encephalomyelitis present                                     |                    |       |
| Absent                                                            | REF                |       |
| Present                                                           | 0.98 (0.28, 3.40)  | 0.979 |

Abbreviations: ICU: Intensive Care Unit; GCS: Glasgow Coma Scale, WNV: West Nile Virus; IVIG: Intravenous Immunoglobulin; CSF: Cerebrospinal Fluid; IgM: Immunoglobulin M; IgG: Immunoglobulin G; PCR: Polymerase chain reaction; MRI: Magnetic Resonance Imaging; EEG: Electroencephalogram

**eFigure 1: Flow chart showing number of participants screened and enrolled.**

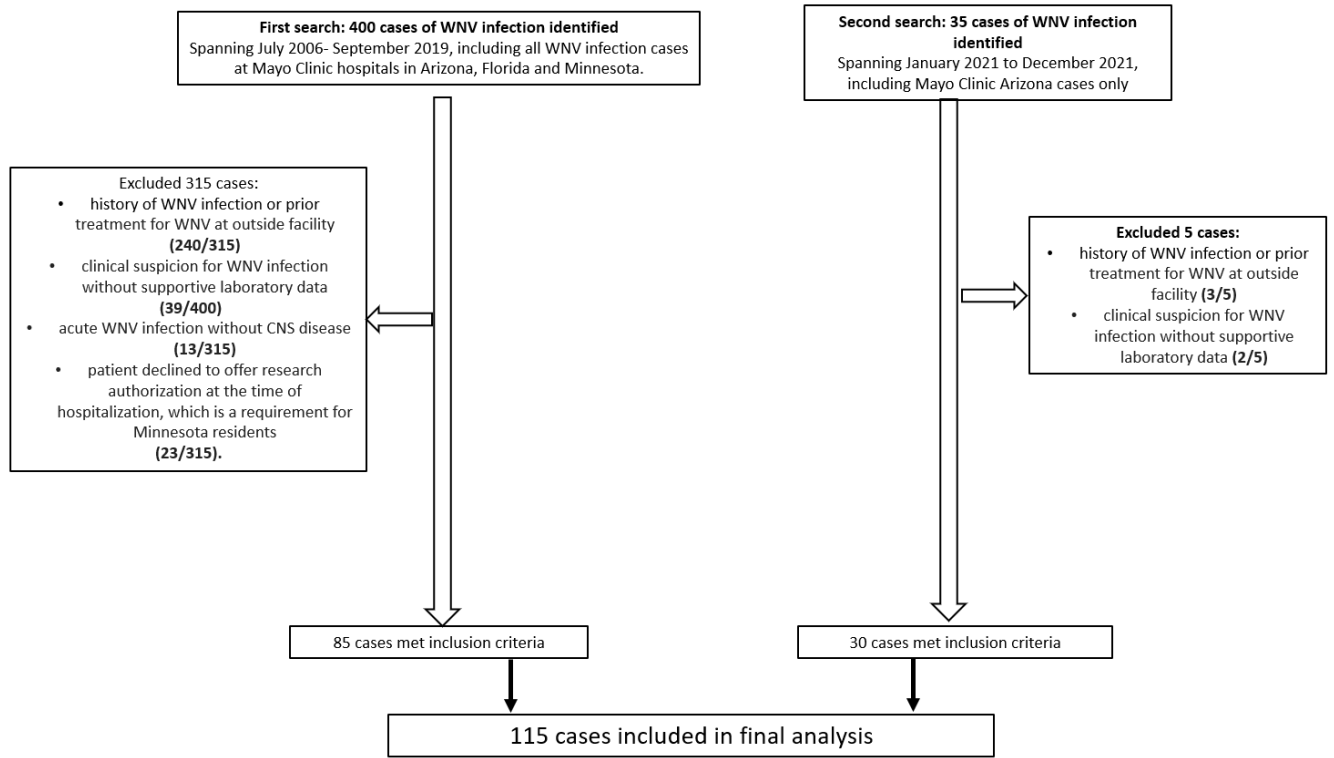

eFigure 2: Total number of neuroinvasive west Nile virus cases admitted between July 2006 to September 2019, grouped by the months and season of presentation independent of the year.

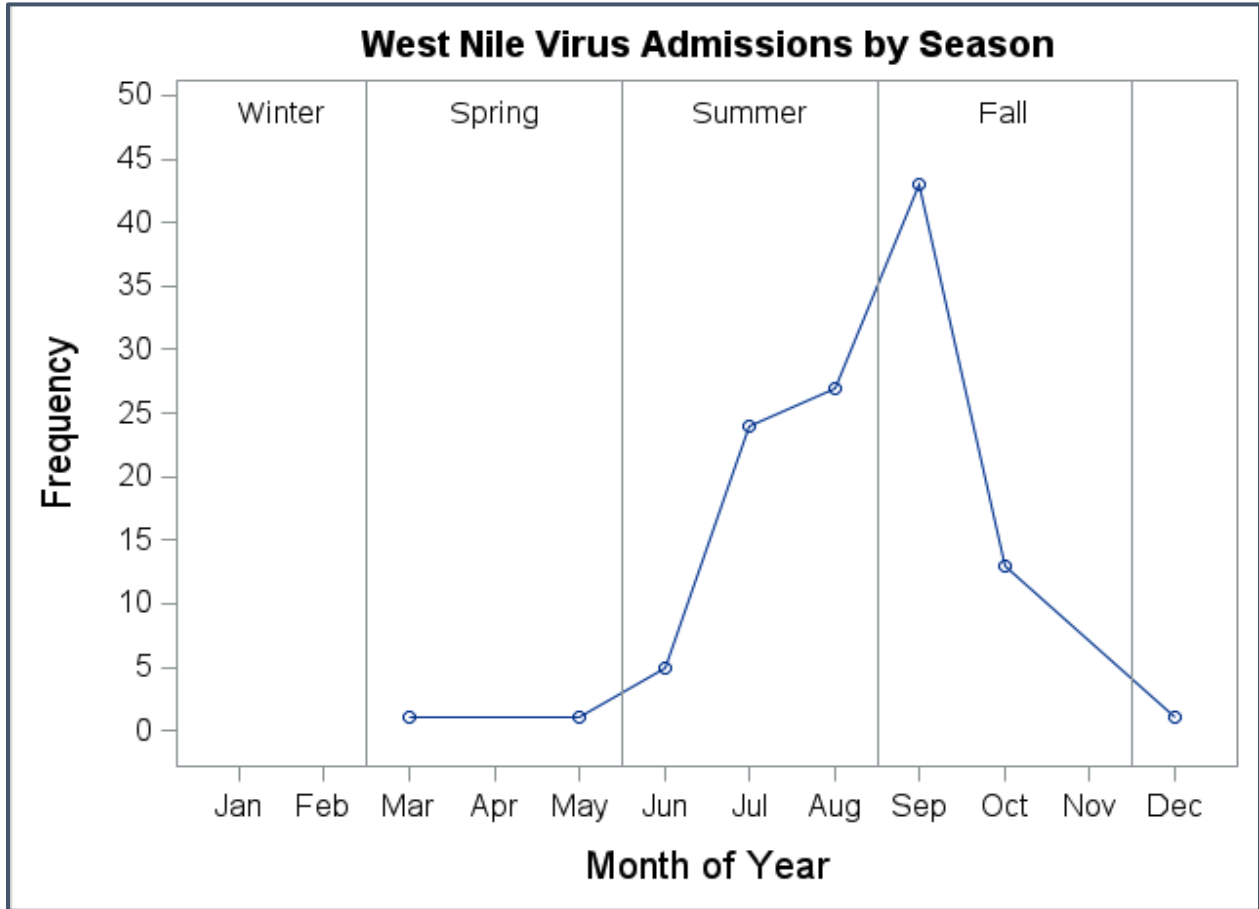

Supplement: jamanetwopen-e244294-s001.pdf [file jamanetwopen-e244294-s001.pdf]
