# Supplementary material for: Neuroinvasive West Nile Virus Infection in Immunosuppressed and Immunocompetent Adults
Source: PubMed Central journal article supplement (PMC10979308; doi:10.1001/jamanetworkopen.2024.4294), 2024-03-28
Supplement: jamanetwopen-e244294-s002.pdf [file jamanetwopen-e244294-s002.pdf]

## Data Sharing Statement

Mbonde. Neuroinvasive West Nile Virus Infection in Immunosuppressed and Immunocompetent Adults. *JAMA Netw Open*. Published April 01, 2024.  
doi:10.1001/jamanetworkopen.2024.4294

### Data

**Data available:** Yes

**Data types:** Deidentified participant data

**How to access data:** Please send requests to [mbonde.amir@mayo.edu](mailto:mbonde.amir@mayo.edu) and [grill.marie@mayo.edu](mailto:grill.marie@mayo.edu)

**When available:** With publication

### Supporting Documents

**Document types:** Statistical/analytic code

**How to access documents:** [mbonde.amir@mayo.edu](mailto:mbonde.amir@mayo.edu)

**When available:** With publication

### Additional Information

**Who can access the data:** Anyone with a reasonable request. Upon approval.

**Types of analyses:** For any purpose

**Mechanisms of data availability:** After approval of a request

**Any additional restrictions:** Mayo clinic approval will be required
